# Supplementary material
Source: publisher figshare collection journal article supplement (https://gsajournals.figshare.com/ndownloader/files/13055057)
Supplement: Supplementary file 1 [file 13055057]

## Sheet: Sup. Table2
Bernal Rubio et al 2018
Whole-genome multi-omic study of survival in patients with glioblastoma multiforme
Ilmn Probe	Gene	tValue	PrevRep		Code
cg15414833	RUNDC3B;ABCB1	8.20169			Ilmn Probe	Illumina450 Array CpG probes
cg15520279	HOXD8	8.14163			Gene	Annotated Gene
cg20507276	OR2L13	8.0682	Lai et al. 2014		tValue	t value from test of differentially methylation with age.
cg06377278	RUNX3	7.88041	Lai et al. 2014		PrevRep	Previous reported hypermethylated: genes associated with GBM (Lai et al. 2014) and brain aging (Horvath et al. 2012).
cg18236477	ATP8A2	7.79708
cg22709192	HOXC11	7.63605
cg04528819	KLF14	7.6246			Quartile	tValue	Color
cg06493994	SCGN	7.6172	Horvath et al. 2012		1	[-7.734,-1.544)
cg04062391	ZNF560	7.38717			2	[-1.544,-0.447)
cg06498267	HCN1	7.37361	Horvath et al. 2012		3	[-0.447, 1.027)
cg10189695	GPR78	7.20623			4	[ 1.027, 8.202]
cg22815110	FOXD3	7.18363	Horvath et al. 2012
cg07017374	FLT3	7.13565
cg03026462	FOXA1	6.95263	Horvath et al. 2012
cg18815943	FOXE3	6.95146	Horvath et al. 2012
cg04623955	DIO3	6.93629
cg14859460	GRM6	6.92957
cg22836229	EFCAB1	6.90137	Horvath et al. 2012
cg27634151	GPR83	6.89546	Horvath et al. 2012
cg08097882	POU4F1	6.84023
cg24250393	PRKCB	6.82371
cg15835825	HTR5A	6.81634
cg20339230	ST8SIA2	6.81208
cg19496782	GATA6	6.77189
cg12448933	RAB37	6.75334
cg18239753	KHDRBS2	6.73479
cg19502744	SRD5A2	6.73165	Lai et al. 2014
cg20052718	TWIST1	6.72399	Horvath et al. 2012
cg17162024	FAM150A	6.6906
cg10235817	ADRA2C	6.65888	Horvath et al. 2012
cg24826867	IRF8	6.64515
cg02620013	MLNR	6.63083	Horvath et al. 2012
cg13425637	PRKCH	6.61924
cg01295203	PRDM14	6.61615
cg25084878	FBN2	6.604	Horvath et al. 2012
cg23950724	SYT10	6.60131	Lai et al. 2014
cg17861230	PDE4C	6.57132
cg23771603	MYO3A	6.56014	Horvath et al. 2012
cg26059153	MACROD2	6.49619
cg21410991	ISL1	6.46173
cg20692569	FZD9	6.45261
cg05714219	GALNT14	6.43317	Lai et al. 2014
cg11657808	RYR2	6.39441	Lai et al. 2014
cg15842276	MTNR1B	6.3638
cg25057743	PTH2R	6.35893
cg08303146	KCNQ1	6.28104
cg02008154	TBX20	6.27749	Horvath et al. 2012
cg00027083	EPB41L3	6.26256
cg26252167	GPR6	6.26234	Horvath et al. 2012
cg25942450	TLX3	6.25947	Horvath et al. 2012
cg22752533	SLC12A5	6.25203
cg18972811	SLIT2	6.21
cg16154416	RASGRF1	6.17762
cg25806808	CXCL1	6.10931	Horvath et al. 2012
cg22108265	RAB6A	6.10432
cg17923358	RELN	6.07838	Lai et al. 2014
cg05839235	NPR3	6.07776	Horvath et al. 2012
cg04836038	DOCK9	6.05136
cg04632671	PPARG	6.03418
cg23089840	LRRC3	6.0014
cg03664992	BMP8A	5.96817
cg11378840	HHEX	5.88133
cg10141715	SLC5A8	5.8776	Horvath et al. 2012
cg12614105	NPY	5.84777
cg04598121	PENK	5.8474	Horvath et al. 2012
cg03963198	IRX4	5.81099	Horvath et al. 2012
cg07533148	TRIM58	5.81091	Horvath et al. 2012
cg13462129	DLX5	5.81047
cg01610488	TRPA1	5.80602	Horvath et al. 2012
cg07084163	UGT3A2	5.80026
cg08572611	ACTL6B	5.80015	Horvath et al. 2012
cg02250594	ONECUT2	5.7802
cg14008883	SLC18A3;CHAT	5.75918
cg10525488	C4orf32	5.75758
cg25192419	DOCK5	5.73688	Lai et al. 2014
cg04291079	MEG3	5.73227	Lai et al. 2014
cg22678136	SNRPN	5.71989
cg27096144	MSX2	5.70353
cg09936561	DRD5	5.6971	Lai et al. 2014
cg05250458	ZNF177	5.68961	Horvath et al. 2012
cg16041660	PRICKLE1	5.67377
cg24989962	PTGDR	5.65373
cg03611555	SLC25A21;LOC100129794	5.6452
cg10316381	SNX10	5.62436
cg14991487	HOXD9	5.58654	Lai et al. 2014
cg03506489	KCNA4	5.57937
cg10019507	SSTR4	5.56841	Lai et al. 2014
cg08806153	HOXD11	5.56119	Horvath et al. 2012
cg22670329	CXCL6	5.55404
cg25568243	DEM1	5.53832
cg11846956	KLK10	5.48761
cg01830294	WNT2	5.47949	Horvath et al. 2012
cg11897314	PRR16	5.46616
cg03469054	TMEM132D	5.44505
cg19988449	BNC1	5.43732
cg01817029	LOC283392;TRHDE	5.42926
cg03943081	TCERG1L	5.39511
cg25558099	TOP3A;SMCR8	5.38645
cg10883303	HOXA13	5.38304	Horvath et al. 2012
cg19899882	FOXQ1	5.37438
cg02748539	SLC9A3	5.37015
cg01366419	WBSCR17	5.36714
cg00453193	TES	5.35638	Lai et al. 2014
cg22892110	MAPK15	5.35229
cg24908499	DLK2	5.34105
cg24562819	THBD	5.33774
cg03544320	CRMP1	5.28523
cg06274159	ZFP42	5.2504
cg07103493	SLC27A6	5.24027
cg11016563	TRPC6	5.23061
cg08583049	FOXB1	5.21189	Horvath et al. 2012
cg17241310	BARHL2	5.20133
cg01064307	CD55	5.17591
cg27320127	KCNK12	5.1456
cg16254309	CNTNAP2	5.14547
cg02440177	ZNF702P	5.13638
cg06092815	SPHKAP	5.13406
cg01405761	CLVS1	5.1327
cg23710218	MSC	5.11673	Lai et al. 2014
cg17217677	SMPD3	5.11542	Lai et al. 2014
cg06005396	HCN2	5.11186
cg22719623	OPRM1	5.10718
cg00548268	NPTX2	5.10244	Horvath et al. 2012
cg13526007	LRFN5	5.0971
cg07671603	C7orf13;RNF32	5.09554
cg13191049	SYNM	5.09524
cg16884042	SGPP2	5.08082
cg23290344	NEFM	5.06836
cg08460435	C1orf59	5.06088
cg25823578	PTGER2	5.02673	Lai et al. 2014
cg10539507	NKX6-1	5.00701
cg03414321	HCK	4.97973
cg11732619	SLIT3	4.96912
cg16509658	GABRB2	4.96758	Horvath et al. 2012
cg18573383	KCNC2	4.96497	Horvath et al. 2012
cg07758904	SLC46A2	4.95959
cg01697732	FAM20A	4.95903
cg07376535	ADCYAP1	4.95497
cg21665000	MYOCD	4.9357	Horvath et al. 2012
cg07490776	AP3M2	4.9035
cg06954481	GBX2	4.89534	Horvath et al. 2012
cg06263495	ASCL2	4.87917
cg03634234	MLL3	4.87905
cg07175883	HOXD13	4.87652
cg08768421	GDA	4.87105	Horvath et al. 2012
cg12946225	HMG20B	4.86887	Lai et al. 2014
cg11990309	HTR1E	4.86705
cg23317501	UGT3A1	4.86521
cg08307816	DEGS2	4.86283
cg14743462	HIST3H2A	4.85995
cg24113449	ADRBK2	4.85788
cg21092462	KCNH1	4.84586
cg14323109	KDR	4.83574	Horvath et al. 2012
cg03874199	HOXD12	4.82083	Horvath et al. 2012
cg06139836	EBF3	4.82063
cg26862286	NCL	4.81768
cg17256157	NMBR	4.81447
cg22946150	SH3GL3	4.80735	Horvath et al. 2012
cg21577049	WDR69	4.80636
cg10553028	CMTM8	4.79475
cg10994430	PALM2;PALM2-AKAP2	4.75173
cg02216250	OCLN	4.74672
cg03316864	B3GNT3	4.74624
cg17834752	KCNK9	4.73542
cg11981599	GATA4	4.72593
cg03980304	IL4R	4.71886
cg17253459	OLFML3	4.71684
cg13562542	GPR27;EIF4E3	4.71567
cg07737781	MLXIPL	4.70665
cg15309006	CHP2	4.69308
cg12277666	TDRD5	4.68686
cg05389335	TACR3	4.68629	Lai et al. 2014
cg03302287	PKP2	4.66619	Horvath et al. 2012
cg20959866	AJAP1	4.65911	Lai et al. 2014
cg22879515	MIR34B;BTG4;MIR34C	4.62233
cg04943986	NR2F2	4.60192	Horvath et al. 2012
cg07059052	TCEB2	4.60092
cg18555440	MYOD1	4.59334	Horvath et al. 2012
cg04891836	TNFSF14	4.5872
cg07703401	HBQ1	4.57953	Horvath et al. 2012
cg09549827	ESPN	4.57007
cg20387341	FGF10	4.55936	Horvath et al. 2012
cg01765461	TNFRSF11A	4.55376
cg24924779	KCNG1	4.54969	Horvath et al. 2012
cg00059225	GLRA1	4.54597	Horvath et al. 2012
cg02141570	LOC348840	4.53192
cg25766046	ROR2	4.52755	Horvath et al. 2012
cg21296230	GREM1	4.5039	Horvath et al. 2012
cg12374721	C17orf93;PRAC	4.49173
cg22418909	SFRP1	4.48525	Horvath et al. 2012
cg05860890	KCNV1	4.4845
cg26054540	NKD2	4.47186
cg12422450	CHGA	4.43642
cg17412258	DLK1	4.42202
cg09952204	RASGRF2	4.42034
cg15731815	RNF207	4.41756
cg08186362	HRH3	4.41437	Horvath et al. 2012
cg23141333	DENND2C	4.40376
cg15439862	DSC3	4.40115	Horvath et al. 2012
cg16232126	SLC5A7	4.39968	Horvath et al. 2012
cg19219437	PCOLCE2	4.38814
cg21289015	USH1C	4.38783
cg04599297	GAD2	4.3856
cg04922810	CRHR2	4.3833	Horvath et al. 2012
cg18794577	GRIN3A	4.36056
cg13481359	EGR4	4.36027	Lai et al. 2014
cg17677397	CD300C	4.35842
cg17992056	ICMT	4.3527
cg02915837	TEAD4	4.35176	Horvath et al. 2012
cg05358404	RTEL1	4.34112
cg23435746	TWSG1	4.33581
cg18438777	NPY5R	4.33497
cg07846220	LAMA1	4.33349	Horvath et al. 2012
cg22183706	CALCA	4.33219	Lai et al. 2014
cg14882700	OTOP1	4.33024
cg10530281	TBX3	4.32625
cg23187653	PCSK1	4.32103
cg13577407	FLNB	4.31297
cg15107670	WT1;WIT1	4.30337
cg10644361	MIPOL1	4.30233	Horvath et al. 2012
cg13384396	ADCY5	4.29756
cg24892510	ZNF415	4.2968
cg13702536	GPR81	4.2945
cg25802093	SPAG6	4.29284	Horvath et al. 2012
cg27590397	SSTR1	4.28906	Lai et al. 2014
cg14415214	PHLDA2	4.28887
cg21591742	HOXD10	4.2851
cg26608332	MED15	4.28469
cg18180783	MYOZ1	4.28354
cg19923810	KLHL17;NOC2L	4.28107
cg05067286	TMEM45B	4.27817
cg26221631	BARX2	4.27746
cg17619823	ADRB3	4.27228
cg19283196	SLC10A4	4.27129
cg17183546	D4S234E	4.26698
cg27009703	HOXA9	4.26055
cg23303408	POU4F3	4.25447
cg22334000	C4orf22	4.25081
cg27321931	DSP	4.2489
cg02332525	GRM7	4.24469	Horvath et al. 2012
cg14550066	NCR1	4.24445
cg25763788	HTR1B	4.24278
cg15201877	PTGER3	4.24191	Horvath et al. 2012
cg26885858	NBPF3	4.23875
cg26656113	NPFFR2	4.23796
cg03258472	CRB3	4.2326
cg11438428	PTF1A	4.23188
cg12089439	TUSC3	4.23182
cg15760840	HOXA11AS;HOXA11	4.2314
cg24214470	SERPINF1	4.22406
cg24133115	PDE10A	4.2219	Horvath et al. 2012
cg27626299	EVX1	4.20766
cg09260089	NKX6-2	4.18321	Horvath et al. 2012
cg12238343	RXFP3	4.17049
cg13921352	FAM19A4	4.17007	Horvath et al. 2012
cg10303487	DPYS	4.1613
cg01404615	DKK2	4.15785
cg14925024	C1orf35	4.15702
cg07480567	HS3ST3A1	4.15471	Horvath et al. 2012
cg24199834	POU4F2	4.15378
cg14249872	KCNK1	4.1509
cg21281799	DYRK2	4.14373
cg25423576	RFX6	4.14147
cg12497692	ZBTB32	4.13705
cg00075967	STRA6	4.13151
cg01186777	TNFSF9	4.12878	Lai et al. 2014
cg04759439	ERC2	4.12871
cg11308840	TMEM215	4.12387
cg24428042	ECHDC3	4.12323
cg09053680	UTF1	4.11928
cg22748573	CITED4	4.11272
cg22995106	SF3B3;COG4	4.11026
cg23694248	PTPRR	4.10446
cg11611600	ADAMTSL3	4.10013
cg18956481	CYP24A1	4.08839
cg06132342	KRT85	4.07778
cg10970409	VIPR1	4.07584
cg11530960	DMRT2	4.07407	Horvath et al. 2012
cg08946117	C2orf27B	4.06589
cg16426459	MLPH	4.06109
cg13969584	CENPBD1;AFG3L1	4.06019
cg23273897	MME	4.05798
cg03807235	PEX7	4.05559
cg26186727	NETO1	4.05367
cg03243506	TMC2	4.0512
cg17301902	GNA14	4.04867	Horvath et al. 2012
cg02787991	SECTM1	4.04784
cg02692952	TRAF6	4.04454
cg13021384	SLC27A2	4.04353
cg24396745	HCN4	4.03679
cg04504095	FOXC1	4.0348
cg00658626	CCDC63	4.01813
cg02416716	ZNF215	4.01693
cg25971347	FOXF1	4.00432
cg01722994	GRIN2A	3.99187
cg00772000	NHLRC1	3.99021
cg18397653	DMP1	3.97998
cg27398547	C14orf39	3.97911
cg25990647	OPRK1	3.96629
cg13858139	ZNF43	3.96432
cg17258195	ISLR	3.96233
cg05674199	AHCY	3.95612
cg13297865	ELOVL4	3.95456
cg19973135	MARVELD3	3.95182	Horvath et al. 2012
cg25084525	NIPAL1	3.9501
cg24890043	TMEM163	3.94936
cg15239123	SMOC1	3.94844
cg06816106	SPDYA	3.94708
cg06638433	IGF2BP1	3.94658	Horvath et al. 2012
cg18638496	FGF5	3.94627
cg02994974	SPON1	3.94218
cg20209009	TBX21	3.93819
cg02497758	MAFB	3.93562	Horvath et al. 2012
cg05434957	ICA1	3.91487
cg05266781	IRX5	3.9136	Horvath et al. 2012
cg01419679	PTTG1IP	3.91302
cg15747595	TSPYL5	3.91098
cg25999867	GLB1L3	3.90874
cg14696396	TM6SF1	3.90806
cg02915261	LSR	3.9044
cg24824266	SV2B	3.90352
cg19576304	RAX	3.90234	Horvath et al. 2012
cg13929328	FOXI2	3.89664
cg03556497	SLC32A1	3.89261
cg24205633	ACN9	3.89004
cg11956146	CABYR	3.88468
cg13449778	FAM163A	3.85673
cg15613048	KIF17	3.84255
cg10523019	RHBDD1	3.84099
cg15452573	SNCA	3.83489
cg10531372	FAM71A	3.83075
cg21529533	HLA-G	3.82563
cg16873863	SLC22A18AS;SLC22A18	3.8223
cg23131950	AP2S1	3.82102
cg14850026	L1TD1	3.80728
cg18691434	STAG3;GPC2	3.80048
cg18702197	HOXD3	3.79709	Lai et al. 2014
cg05056120	EBF1	3.79474
cg27158143	EIF3D	3.79019
cg23054883	FZD10	3.78694
cg00202702	C11orf70	3.78371
cg13271951	FAM57B	3.77691
cg26219051	SCUBE1	3.77688
cg25177452	TMEM171	3.76338
cg06268694	CELSR1	3.76174
cg13904771	C10orf47	3.75639
cg02919422	SOX17	3.73393	Horvath et al. 2012
cg00344709	POTED	3.73357
cg26344532	PDX1	3.72909
cg20162146	MCM5	3.72179
cg14221171	TAC1	3.71901
cg19953406	KLK7	3.71655
cg17166338	TERT	3.71419
cg21902544	CBLN2	3.69185
cg02245378	PAX3;CCDC140	3.6886
cg08558340	SRRT	3.68711
cg03365437	ALDH1A2	3.68195	Horvath et al. 2012
cg09660171	LMX1B	3.68068
cg09220361	GABRG2	3.67706
cg11377136	PKDREJ	3.6731	Horvath et al. 2012
cg07572341	FOXA2	3.67134	Horvath et al. 2012
cg04970117	SLC6A20	3.66473
cg04048259	EDN3	3.66393
cg12792011	ZNF329	3.66168
cg03663715	FOXD1	3.65507
cg23432345	HOXA7	3.65385	Lai et al. 2014
cg10770529	ZNF274	3.65194
cg05052633	ADAP2	3.64911
cg13975369	TSGA14	3.64203
cg17398003	C5orf25	3.63036
cg22334665	SLC22A16	3.62754
cg19378133	A2BP1	3.62531
cg15982419	RALBP1	3.62434	Lai et al. 2014
cg22809047	RPL31	3.61993
cg07686479	LMX1A	3.61697
cg00143998	HIST3H2A;HIST3H2BB	3.61548
cg05421555	AKAP13	3.61487
cg07241568	ABO	3.60616
cg02994956	NEFH	3.58999	Horvath et al. 2012
cg16092786	WT1	3.58795
cg25692323	ZNF485	3.58606
cg15636365	PNPLA7;MRPL41	3.58115
cg11191210	VGLL2	3.57423	Horvath et al. 2012
cg05589246	HOXC12	3.57206
cg06790324	GRB10	3.57164
cg18234011	IGF2BP2	3.56085
cg03259469	SVIL	3.55715
cg18750960	HOXD4	3.5566
cg06277657	DGKI	3.5546
cg03099771	PRSS16	3.55362
cg00263760	VAX1	3.55075	Horvath et al. 2012
cg20890210	KCNB2	3.54596	Horvath et al. 2012
cg10140638	PTPRN	3.54589
cg21801378	BRUNOL6	3.54573
cg04005707	CWH43	3.54143
cg00510956	KHDRBS1	3.54027
cg14277764	PMCHL2	3.53581
cg19025723	ATPIF1	3.52266
cg21685266	EHHADH	3.51009	Lai et al. 2014
cg08612037	BTBD11	3.50473
cg11856697	DNAI2	3.50468
cg03803009	GPR142	3.48379
cg19721889	HAND1	3.48111	Horvath et al. 2012
cg08124399	DDX43	3.48074
cg23300372	CARTPT	3.47244
cg26466858	LCE3A	3.469
cg07986525	NFE2L3	3.46438	Lai et al. 2014
cg18242139	ELAVL4	3.46373
cg19781251	PEG10	3.46197
cg25226247	TFAP2B	3.46026	Lai et al. 2014
cg03641225	DIRAS3	3.45841
cg17745122	IRX3	3.45349
cg07237939	SLC22A3	3.45163
cg10173723	KRT27	3.44992
cg19945840	SDF4;B3GALT6	3.44878
cg19635712	EPB41L4B	3.44787
cg18746357	RELA	3.4466
cg02409351	ALX1	3.44012
cg15576195	HTATIP2	3.43774
cg22229142	KCTD17	3.43711
cg04454951	VWC2	3.43529
cg25691167	FERD3L	3.43471	Lai et al. 2014
cg13634864	ADAP1	3.43407
cg24473633	DENND3	3.43144
cg05726109	SEPT5;GP1BB	3.42866
cg25426743	HOXA3	3.42426
cg12052258	S100A11	3.42154
cg21096915	LOC84856	3.41993
cg16069910	NXNL1	3.41949
cg09068528	ACADL	3.41527	Horvath et al. 2012
cg05755354	FRMD4A	3.41274
cg09038885	ADRA1B	3.4112
cg24278423	FOXA3;SYMPK	3.4077
cg26117431	LRRC39	3.40146
cg20795913	MLX	3.39822	Lai et al. 2014
cg17685628	NKX2-8	3.39786	Horvath et al. 2012
cg21613754	AAMP;PNKD	3.39773
cg15827031	NUP155	3.39733
cg23843505	MYBL2	3.3943
cg26780333	ACOT4	3.39308	Horvath et al. 2012
cg11812218	GHSR	3.38468
cg05373457	KCNS2	3.37781
cg09088834	NINL	3.37751
cg09872233	ALOX15	3.37708
cg06550629	GPR133	3.3739
cg17671157	KCNK10	3.37334
cg21688264	SNAP91	3.37314
cg02849695	CCDC19	3.37138	Lai et al. 2014
cg25007250	NOS3	3.36639
cg03614513	TSPAN2	3.36141
cg07408740	OGDH	3.36042
cg03285457	LBX1;FLJ41350	3.35931
cg20339650	INS-IGF2;IGF2AS;IGF2	3.35329
cg07042144	NLRP12	3.35211
cg07862358	MYO10	3.34374
cg02978737	PVALB	3.34193
cg01424107	CDX2	3.34101	Horvath et al. 2012
cg25141995	VDAC1	3.33772
cg10319505	RASEF	3.33751	Horvath et al. 2012
cg12127282	HOXD4;MIR10B	3.33587
cg11354906	SFRP2	3.33434
cg23239396	CALCR	3.33219
cg26504021	IRX2;C5orf38	3.33009
cg11654620	TYMP;ODF3B	3.32755
cg05330360	ZPBP2	3.32698
cg07558455	KANK4	3.32472
cg22941086	C12orf40	3.32451
cg11166252	AHR	3.31919	Lai et al. 2014
cg17457560	NRG1	3.31574	Horvath et al. 2012
cg04490714	SLC6A2	3.3113	Horvath et al. 2012
cg12420104	DMRT3	3.30838	Horvath et al. 2012
cg19854301	CDH13	3.30627	Horvath et al. 2012
cg27318281	INO80C	3.3036
cg15997411	JAK1	3.29935
cg04691961	C3orf57	3.29582
cg19132372	GPR1	3.29076
cg13415207	PMAIP1	3.29033
cg11412582	HERC2	3.28949
cg17285325	TYMP	3.28845
cg10037005	CD37	3.28552
cg12610744	KRT4	3.28467
cg05449414	ZNF721;ABCA11P	3.28425
cg13904493	KIAA1804	3.27926	Lai et al. 2014
cg19815904	SEMA3C	3.27559
cg15147516	MIXL1	3.26602
cg13302823	SCRT1	3.26364
cg10273210	TRIM59	3.26311
cg02757432	GPR26	3.26245
cg18769818	ARAP1	3.26179
cg06391660	DCTN1	3.26005
cg22123464	SLC8A2	3.25855
cg00186954	ST5;C11orf17	3.25657
cg20587394	HOXC13	3.25506
cg16708981	ZNF677	3.2506
cg03567830	NTSR1	3.24391	Horvath et al. 2012
cg05807991	TRAM1L1	3.24137
cg12768605	LYPD5	3.23913	Lai et al. 2014
cg10029076	MANF	3.23554
cg12346881	ZNF300	3.2325	Horvath et al. 2012
cg26209058	EIF5A2	3.23142
cg15337897	FGF3	3.23119
cg00247489	CR2	3.22819
cg09991975	JOSD1	3.22147
cg12671744	FAAH	3.21858	Lai et al. 2014
cg07871503	RASGEF1A	3.21789
cg02755525	NETO2	3.21598
cg17839611	ABI3;GNGT2	3.21573
cg13234643	CTSL2	3.21477
cg13948987	HCRTR2	3.19684
cg25908985	IHH	3.1949
cg16636110	ZNF264	3.19432
cg24697329	ARHGEF4	3.19294
cg16689634	CYP4X1	3.18615	Lai et al. 2014
cg13117105	PAQR5	3.18459
cg20520725	HIST1H2BG;HIST1H2AE	3.18413
cg15898840	IGFBP3	3.18307	Horvath et al. 2012
cg13434852	DOCK1	3.18167
cg09067967	UGDH	3.17724
cg15096140	MYO1B	3.17712	Lai et al. 2014
cg21351994	EMX1	3.17649
cg18320336	STEAP1	3.17385	Lai et al. 2014
cg01313514	WNT3A	3.16183
cg07236190	AMDHD1	3.16116
cg19404582	GRIN1	3.16073
cg26389232	SNORD116-1	3.15992
cg00848728	DAB1	3.15931
cg16519742	ZIM2	3.15923
cg05472874	SULT4A1	3.15837	Horvath et al. 2012
cg04862249	ZFP3	3.15598
cg20315951	OVOL1	3.14506
cg22374901	TESC	3.14264
cg12741420	IRF4	3.1415
cg15903395	C2orf51	3.1346
cg09313705	HOXB2	3.13386
cg15374234	CD300LF;RAB37	3.12923
cg14014613	OR3A1	3.12866
cg03804500	ANAPC2;SSNA1	3.12764
cg17959722	MRPL41	3.1246
cg25171089	ASB13	3.1193
cg02498063	CCDC60	3.11702
cg02128567	KCNK5	3.11366
cg08536841	IZUMO1	3.11245
cg03807314	MAP3K8	3.11128
cg08080029	CHD5	3.10843
cg15748507	PRLHR	3.10834
cg11405695	ATAD3C	3.10702
cg14917512	GNA11	3.10364
cg18087477	SYCP1	3.09757	Lai et al. 2014
cg19391527	PNOC	3.09675
cg05403071	SNAI1	3.09581
cg11877382	GLT1D1	3.0932
cg03495868	PTGFR	3.09051
cg05846716	PCSK2	3.08946
cg02844545	GCM2	3.07049	Lai et al. 2014
cg11767711	APLP1	3.06909
cg27442349	SIRT2;NFKBIB	3.06899
cg07715201	GDNF	3.06881	Horvath et al. 2012
cg10301967	VPS52;RPS18	3.06579
cg02972551	KDM3A	3.0627
cg12874092	VIM	3.06194
cg16869108	VHL	3.05785
cg10694152	SLC15A1	3.05701	Horvath et al. 2012
cg09624565	NCF4	3.05298
cg26450866	KCNA7	3.05118
cg08748415	CLIC5	3.05042
cg00521434	GPR61	3.04936
cg24264578	OR2C1	3.04653
cg18638931	MOV10L1	3.04571
cg09649610	GNG4	3.04368
cg03941108	C1QB	3.04029
cg18493238	ANKRD30A	3.03826
cg20940661	KCNS3	3.03664	Horvath et al. 2012
cg12428416	GJA3	3.03566
cg14472778	CLCN6;MTHFR	3.03477
cg22243662	ATP6V1C2	3.03366
cg02590345	LPPR1	3.03049
cg08418111	LDHC	3.02106
cg26071978	AGPAT9	3.02007
cg12910797	HOXB3	3.01875
cg00015770	QRFPR	3.01872
cg25994725	LOC285847;C6orf81	3.01816
cg09450020	STEAP2	3.01689
cg00579402	FUT6	3.01205
cg12271587	TTF1	3.01034
cg21478490	PROP1	3.00988
cg00929855	HSPA1A;HSPA1L	3.00974
cg24401912	STYK1	3.0096
cg02699167	FBXL2	3.00722
cg11052143	ALS2CR11	3.0064
cg22134325	NPAS4	3.00422
cg22373112	RAB5C	3.00333
cg27643859	TM9SF4	2.99811
cg04317399	HOXA4	2.99785	Lai et al. 2014
cg16356956	CSF2RB	2.99402
cg12530270	DCST1;DCST2	2.99374
cg07903918	GABBR2	2.99299
cg26282384	PCDHGA4;PCDHGA6;PCDHGA1;PCDHGA5;PCDHGB1;PCDHGA3;PCDHGA2;PCDHGB4;PCDHGA7;PCDHGB2;PCDHGB3	2.98744
cg22692158	PRB4	2.98436
cg08936952	HEATR4	2.98402
cg12532169	NDN	2.98283
cg26065841	CHAC1	2.97765
cg14607011	C10orf125	2.97528
cg08764758	SLFN11	2.97378
cg20546002	COL23A1	2.97076	Horvath et al. 2012
cg17188046	T	2.96552	Horvath et al. 2012
cg23548479	CDKN1C	2.96482
cg10088985	CXCL5	2.96255	Lai et al. 2014
cg21993406	CENPH	2.96193
cg21207436	C14orf115	2.96066
cg17399352	SPHK1	2.9606
cg17793621	ATP10A	2.95704
cg18248112	KCNJ15	2.95594
cg07361385	AHSG	2.95519	Lai et al. 2014
cg18506672	SNRPN;SNURF	2.9549
cg20967028	ART4	2.95247
cg01184449	EML4	2.95122
cg02790471	SCML4	2.94286
cg10318443	GLOD4;RNMTL1	2.94196
cg03734874	TMEM179	2.9416
cg02397514	HES4	2.94154
cg03811478	SOX14	2.93841	Horvath et al. 2012
cg11104347	DUSP23	2.93809
cg02126638	HAUS2;LRRC57	2.93064
cg00910067	SLC7A10	2.92687
cg00619207	DENND2D	2.9213
cg22429822	RAB3B	2.91428
cg18676053	STOM	2.91307
cg19456540	SIX6	2.91132
cg15563952	DHTKD1	2.91039
cg15044041	WDR52	2.90909
cg04572898	AEN	2.90868
cg07017477	THEM4	2.90696
cg05023116	NLRP5	2.90696
cg09486093	HSD17B4	2.9053
cg02136132	KCNK13	2.905
cg00679738	FAM89A	2.90394
cg18878432	LOC404266;HOXB6	2.90285
cg12784172	TUBGCP4;ZSCAN29	2.89771
cg09637363	CCND1	2.89451	Horvath et al. 2012
cg07823492	HOXB1	2.89413	Lai et al. 2014
cg09212058	PRKD3	2.89202
cg10835876	DPT	2.88905
cg12514620	SSBP3	2.88827
cg02786378	SLC7A2	2.87875
cg22190114	NLRP8	2.87823
cg21517055	C19orf57;CC2D1A	2.87758
cg24975222	CDCP1	2.8758	Horvath et al. 2012
cg19979773	FCN3	2.87493
cg15534366	CDH4	2.87461
cg14761227	CPA1	2.87352
cg15660077	NLGN2	2.87312
cg09161592	PANK1	2.8705
cg08001895	EPHA7	2.86921
cg14449051	SLC6A15	2.86211	Lai et al. 2014
cg22325715	CNTD1;CCDC56	2.85377
cg02920216	CHODL	2.85314
cg07038400	PPP2R3A	2.85233
cg11847808	EPHA8	2.85174	Horvath et al. 2012
cg21949781	PSTPIP2	2.84482
cg12106945	COL13A1	2.84133
cg21331821	ZSCAN1	2.8357
cg02762689	GUCA1B	2.833
cg11688469	TNNI1	2.82944
cg17252960	ID4	2.82791	Horvath et al. 2012
cg01446692	CER1	2.82489
cg14789590	BPIL2	2.82133
cg13517305	CHCHD6	2.81898
cg24506604	KRT80	2.81882
cg14590817	ADARB2	2.81654
cg06948937	CDK18	2.81548
cg08191854	TRPM2	2.81343
cg18242682	FOXK2	2.81182
cg25829729	SOHLH2	2.81063
cg16268563	ATP6V1G2;NFKBIL1	2.8089
cg20253551	ESR1	2.8062
cg07378350	GDF5	2.80593
cg07842062	MEFV	2.80223
cg25229015	WDR61	2.79563
cg01567482	RGS14	2.79368
cg25853833	C2orf29	2.79322
cg26045434	HR	2.79262
cg05106502	SKAP1	2.79153
cg17853587	NDST3	2.79054
cg27226618	ACP1	2.78911
cg14775560	FOLH1	2.78888
cg13042487	ZFYVE21;XRCC3	2.7858
cg06291867	HTR7	2.78448	Horvath et al. 2012
cg26599006	GSC2	2.78435
cg13552869	SEZ6L2	2.78159
cg23850212	ZFP28	2.78145
cg09378940	LACTB2;XKR9	2.78091
cg08538752	TPTE	2.77863
cg14496375	CLDND2	2.77571
cg06918467	OLIG3	2.77499	Lai et al. 2014
cg08101264	ACOT8;ZSWIM3	2.77283
cg12402251	CALB1	2.76944
cg24920358	PPIE	2.76827
cg02966329	TTK	2.76781
cg04265576	HOXA6	2.7651
cg19248557	HLA-DRA	2.76478
cg04732193	HSD11B1	2.76364
cg10608333	HIST1H4K	2.76214
cg02608019	SYK	2.75707
cg20352798	ZP3;SRCRB4D	2.75388
cg06921282	HRAS;LRRC56	2.75262
cg22130834	TTC22	2.74694
cg12312863	AMDHD2;ATP6V0C	2.74648
cg17185639	ITGB3	2.74648
cg09480837	PLCE1	2.74637
cg08896945	CALCB	2.74488
cg10501629	ATP2B1	2.74324
cg11262874	ZNF681	2.74287
cg21695020	DPEP3	2.74277
cg24116886	DEFB127	2.7426
cg20134215	MCHR2	2.73978
cg19461621	COLEC12	2.73977	Horvath et al. 2012
cg00447208	TMC8;TMC6	2.73856
cg25332298	ELAVL3	2.73641
cg07548313	CD1C	2.73407
cg25530169	SPIN1	2.73367
cg01473816	ELF5	2.73278
cg06912252	C9orf125	2.72865
cg23941599	FEM1C	2.72579
cg15933546	DNAH8	2.7241
cg21246783	CLGN	2.72247
cg04636557	C1orf124;EXOC8	2.7199
cg06765947	UROC1	2.71814
cg20906802	OPN5	2.71289
cg06675478	SOX1	2.71201	Horvath et al. 2012
cg20331177	KRTAP4-2	2.71097
cg07039362	CES7	2.70887
cg15439078	MYL3	2.70843
cg26884154	STXBP2	2.7056
cg21179457	INSM2	2.7056
cg19394737	CCDC108	2.70361
cg14782678	TMEM102	2.70262
cg22174355	DNAJC25;DNAJC25-GNG10	2.70213
cg17439694	CP	2.70158
cg17795586	MED12L;P2RY13	2.69729
cg11429658	ABCC13	2.69502
cg11094938	ATP2A1	2.68749
cg21129531	LRRC4;SND1	2.68483
cg10335931	MYBPC3	2.68327
cg10729531	TCFL5	2.68324
cg13565157	PDE1B	2.68269
cg08164900	PDZD8	2.68116
cg23752923	MCOLN3	2.68097
cg10074409	IRF6	2.68068
cg03853151	OAT	2.67745
cg13991233	GAS7	2.67552
cg06015218	GRM1	2.67547
cg24461814	KRT84	2.67379
cg04564030	CDH7	2.67312
cg15187606	PDZK1IP1	2.6728
cg16722536	TBX1	2.67084
cg18059223	NLRP2	2.6678
cg04008913	SNRK	2.66766
cg09601629	CCDC105	2.66725
cg12572827	PDE6H	2.66573
cg09542745	SFRP5	2.66342
cg03538436	NOS1	2.66196
cg00904483	MGMT	2.66024
cg07102705	HTR4	2.65957
cg25159610	PLK2	2.65808	Horvath et al. 2012
cg12293634	RNF149	2.65423
cg09494188	SCGB1A1	2.65358
cg23743114	CCL15;CCL14-CCL15	2.64952
cg08827391	GDI2	2.6488
cg16112050	ENOSF1	2.64813
cg25514503	PER3	2.64105
cg13163729	SIX3	2.63991
cg17387870	CHFR	2.6395
cg27574244	TBCD	2.63799
cg08245487	GSG1	2.63535
cg25145670	HOXB4	2.63515	Lai et al. 2014
cg00290506	CNIH3	2.63494
cg25764464	PLEKHA5	2.63419
cg12645220	PAK7	2.63248
cg09276363	KCND3	2.63226
cg21250577	ETFA	2.62958
cg13081704	KCNQ1DN	2.62889	Lai et al. 2014
cg06659073	SERAC1;GTF2H5	2.62762
cg16864658	CCK	2.62541
cg05454446	BMS1	2.6243
cg14617642	H2AFY2	2.6213
cg18783781	SLC25A33	2.61972
cg04523589	CAMP	2.6192
cg17778867	C21orf29;KRTAP10-8	2.61682
cg15452204	CDX1	2.6168
cg06193382	FAM54A	2.61572
cg19021732	C15orf29	2.61243
cg24432073	CDKL2	2.6123
cg10253484	SCAMP2	2.60875
cg21094669	GLRA3	2.6064
cg21965997	CALY	2.60506
cg10964421	TNFRSF10D	2.60331	Lai et al. 2014
cg19177941	ALDH1A3	2.6007
cg10612997	GREB1	2.59982
cg04518106	RPL26	2.59886
cg24854010	WNT5B	2.598
cg15957394	AFAP1	2.59527
cg05475277	FOXRED2	2.59459
cg14298951	RPS24	2.59154
cg25984124	CDS2;PCNA	2.58777
cg13492340	ITGA8	2.58765
cg03234661	SLC10A1	2.58684
cg24964368	FPR2	2.58532
cg27394566	PLD4	2.58397
cg15764655	SBF1	2.5797
cg03257423	ZFP112	2.57659
cg23683201	SLC22A9	2.57607
cg15401952	KCNIP4	2.57472
cg24358465	HIST1H2AG;HIST1H2BJ	2.5727
cg27552599	DHX35	2.5716
cg00657582	CHD8	2.57019
cg02157083	APOA5	2.56729
cg25856383	CYP1B1	2.56698
cg25268678	PLEKHG6	2.56542
cg06245154	ERCC2	2.56444
cg08331840	KCNU1	2.56351
cg02198582	TSC2	2.55957
cg12202913	C19orf43	2.55818
cg09144422	DDX28;DUS2L	2.55647
cg20893022	MIR7-3;C19orf30	2.55345
cg03602500	KIR3DX1	2.55339
cg04048249	APOC3	2.55221
cg21696393	SOX8	2.55155
cg25902889	FSD1	2.55102	Lai et al. 2014
cg16084788	SLC2A7	2.55052
cg08377000	TIGD2	2.54915
cg05641882	CXCL3	2.54913
cg14458615	C3orf30;IGSF11	2.54784
cg09486567	OVOL2	2.54659
cg01015871	MT4	2.54646
cg23496260	BASP1;LOC285696	2.54602
cg01857260	C19orf41	2.54502
cg03510310	HRASLS2	2.54144
cg00600684	WDR11	2.54139
cg02599464	HIST1H2BK;HIST1H4I	2.54037
cg03761560	DNAJB12	2.53553
cg08393541	NUDC	2.53338
cg08866753	PABPC4	2.53254
cg21428681	NKX3-1	2.53195	Horvath et al. 2012
cg09794131	HYDIN	2.53053
cg15142488	LYPD4;DMRTC2	2.52863
cg20985014	WISP3	2.52814
cg13084429	VWA2	2.52783
cg17138359	MRPL45	2.52516
cg05924191	ZNF770	2.52164
cg11432797	SPN	2.521
cg07570421	PTER	2.52011
cg22527345	CCDC71	2.51884
cg25193494	DEF8	2.51672
cg05252264	FCAR	2.51568
cg12619162	FXYD4	2.5096
cg24422489	FCGR2A	2.5077
cg09425228	CCL20	2.50691
cg20896197	KIF20B	2.50631
cg06353318	OTOP2;USH1G	2.50523
cg23263923	CD70	2.50462
cg15309264	VRK2	2.50403
cg21787291	NKAIN2	2.5014
cg24831427	COQ3	2.49793
cg17977409	SH3GL2	2.49777	Horvath et al. 2012
cg21790626	ZNF154	2.49713
cg06351503	RDBP;SKIV2L	2.49591
cg26555310	RPE65	2.495
cg08431931	WBP2NL	2.4942
cg23352695	NF1;EVI2A	2.48945
cg18393014	CAB39L;SETDB2	2.48626
cg05396987	TMEM155;LOC100192379	2.48449
cg23357981	GRP	2.48442
cg06806080	CD47	2.48182
cg20362772	PDLIM1	2.48177
cg08983259	INSL5	2.48176
cg12024906	HKR1	2.48079
cg18408326	CACNB2	2.47969
cg20630151	BPESC1	2.47795
cg26292864	ITM2C	2.47368
cg18902090	PCDHA7;PCDHA12;PCDHA6;PCDHAC1;PCDHA10;PCDHA4;PCDHA11;PCDHA8;PCDHA1;PCDHA2;PCDHA9;PCDHA13;PCDHA5;PCDHA3	2.47115
cg27465569	IRAK4;PUS7L	2.46956
cg25423111	TSSK4	2.46881
cg26538214	KLF6	2.46837
cg24382521	C7	2.4682
cg10601939	ARL5B	2.46816
cg12967560	LYSMD4	2.4679
cg21358381	PPY	2.46709
cg12601757	ST6GALNAC3	2.46685
cg25993718	CBLN4	2.46417
cg08121954	TDO2	2.46278
cg18915143	PDE6A	2.46157
cg02647265	CCDC92	2.45946
cg12651014	CCDC7	2.45811
cg21547708	SSTR2	2.45723
cg05439318	CYB5B	2.45548
cg17006282	RPL36	2.45491
cg27444994	CDH8	2.45164
cg08463485	ILDR1	2.45134
cg12119029	CDK10	2.45131
cg24675098	SPEF2	2.45056
cg00739120	GAPDHS;TMEM147	2.44974
cg25003924	ARPP19	2.44948
cg20098887	RAB32	2.44876	Horvath et al. 2012
cg23519022	CAPZB	2.44846
cg07351267	LRP3	2.44407
cg00757952	CRYBB1	2.44367
cg24408511	C12orf51	2.44322
cg00371195	F2	2.44125
cg09577651	SIRPB1	2.43905
cg15903282	EPHB1	2.43756
cg01914242	ATP2A3	2.43745
cg00183916	HS3ST3B1	2.43502
cg18881269	GPR162;LEPREL2	2.43394
cg12775479	IGSF10	2.43212
cg25494064	TMOD1	2.43161
cg13323752	SLC2A14	2.43159
cg06479426	SLCO4A1	2.43032
cg17790333	CYP11A1	2.43025
cg20716064	USP6NL	2.42937
cg25830052	TULP1	2.42936
cg08395899	UPF2	2.42276
cg26781886	EMB	2.42116
cg14473924	PDZRN3	2.41715	Horvath et al. 2012
cg06995715	FOXL1	2.41528
cg19188612	CTHRC1	2.41498	Lai et al. 2014
cg06076054	C21orf91	2.41476
cg10252059	CYP20A1	2.41399
cg21242004	VTI1A;ZDHHC6	2.41313
cg12288726	ARF5	2.4118
cg06238491	LAIR1	2.41016
cg05244766	GSTP1	2.40984
cg04779191	CHTF8;CIRH1A	2.40916
cg10180697	DHFR;MSH3	2.40893
cg18573251	RAB3IL1	2.40839
cg22411207	MOS	2.40741
cg20395892	IRAK3	2.4073
cg17505428	ARHGAP21	2.40378
cg20723355	FBXO39	2.40335	Horvath et al. 2012
cg03016571	C17orf73	2.40317
cg10840864	PSMC5;FTSJ3	2.40301
cg25072962	MS4A15	2.3997
cg06698742	TMEM126A	2.39652
cg18146152	C16orf42;GNPTG	2.39462
cg18168989	C9orf41	2.39383
cg03977657	LAMB3	2.39374
cg12391048	PRSS27	2.39372
cg22386774	CRYGA	2.39315
cg14036856	C1orf210	2.39089
cg02672220	SIM2	2.3857
cg01015879	RDX	2.38563
cg09998229	TBXA2R	2.38351
cg11166999	PAR-SN;SNORD107	2.38243
cg02374486	PRF1	2.38204
cg13682722	C14orf102	2.38187	Lai et al. 2014
cg02579133	KRTAP10-8;C21orf29	2.37767
cg10293925	AMPH	2.37762
cg03229887	EIF2B3	2.37682
cg19921353	HLA-DPB1	2.37596
cg21572997	LRP5	2.37372
cg06175025	SPTLC2	2.37244
cg20441175	DNAJC9	2.37217
cg07745725	PSG3	2.37127
cg18678185	KDELR1	2.37048
cg12297221	ART5	2.37008	Horvath et al. 2012
cg09196942	PRAMEF1	2.36954
cg05679613	MEPE	2.36797
cg27583102	KLK5	2.36672
cg05658858	TUBGCP2;ZNF511	2.36662
cg19008809	SFMBT1	2.36557
cg14056644	PITX2	2.36434
cg07371530	RPUSD1;CHTF18	2.36287
cg16584573	FGF8	2.36156
cg16806347	FUK	2.36066
cg06973652	BRCA1;NBR2	2.36037
cg15609321	ZNF512	2.36033
cg18043195	FAM154A	2.35925
cg06491116	MPZL3	2.35901
cg07629017	NPBWR1	2.35805
cg05338167	CALML4	2.35721
cg01291404	COL2A1	2.3564
cg20778294	PPRC1	2.35492
cg25975818	ENPP7	2.35442
cg17165760	ANKRD26	2.35392
cg11471401	KRT6A	2.3537
cg26024843	COL5A1	2.35002	Horvath et al. 2012
cg14902389	MGAT4A	2.34896
cg24825722	ACADVL;DLG4	2.34809
cg17897879	TNFRSF8	2.3471
cg18570262	YIPF2;C19orf52	2.34692
cg19562969	C20orf24	2.34687
cg23147597	CEACAM19	2.34214
cg26350286	ESRP1	2.34205
cg25219134	BRP44;DCAF6	2.33974
cg16984812	PLEKHH2	2.33873
cg07785936	GPR39	2.33751	Horvath et al. 2012
cg19883905	CIDEA	2.33532
cg04458548	FETUB	2.33365
cg04916311	PQLC3	2.33163
cg12559031	DLX4	2.33154
cg08404227	SLCO3A1	2.33139
cg16977872	FKBP2	2.33007
cg19091474	NEO1	2.32974
cg10957200	CDNF;HSPA14	2.32957
cg16184943	ZNF280B	2.32849
cg16911220	KRT86	2.32748
cg22425806	TGFA	2.32665
cg01889448	HLA-DQB1	2.32352
cg03616357	MAP9	2.32342
cg12259537	ZNF606	2.32242
cg07965823	ISM2	2.3215
cg26309134	ZNF542	2.32143
cg12087643	GFRA1	2.32044	Horvath et al. 2012
cg24698622	PPP2CB	2.3195
cg14456683	ZIC1	2.31774
cg09526693	IL2	2.31626
cg17198722	PRDX3	2.31529
cg15743985	CD22	2.31528
cg15514848	FMO1	2.31457
cg09906458	PRND	2.31387
cg10920427	RPF2	2.31289
cg20375690	TMEM51;C1orf126	2.31285
cg20792294	IGF2AS;INS-IGF2;IGF2	2.31106
cg04992673	HEPACAM2	2.31012
cg02827112	SMARCAD1	2.30915
cg05657520	OPTC	2.30817
cg17266238	C21orf94	2.30806
cg26385743	IMP4	2.30559
cg24030627	FCGBP	2.30423
cg15119375	C16orf67	2.30399
cg00273124	NHP2	2.29887
cg01360325	TAF5	2.2986
cg02196655	NOL10	2.29809
cg05755837	PMPCB	2.29786
cg27183007	ZPBP	2.29768
cg20965815	DPCR1	2.29658
cg22718139	HMGCS2	2.29615
cg22187630	CACNA1A	2.29534
cg06493080	HOXB7	2.29372
cg19215261	SLC25A2	2.29287
cg26029902	RAB22A;PPP4R1L	2.29271
cg23404467	KIR3DL3	2.2903
cg27623214	C19orf18	2.28985
cg10490064	CRYBB2	2.28946
cg09869042	CENPM	2.28914
cg26647600	CCR8	2.28902
cg10516359	SLC35C1	2.28879
cg05306006	RPE	2.28837
cg18752854	TNS1	2.28737
cg11093356	DDX19A	2.28724
cg19580810	RAB25	2.28294
cg20520365	NECAB3;C20orf144	2.28068
cg12133004	C12orf54	2.28046
cg15225105	SAC3D1	2.28034
cg10694914	POU2AF1	2.28017
cg08537652	PRDM16	2.27972
cg05723825	TEKT4	2.27905
cg00891278	CCDC37	2.27899	Horvath et al. 2012
cg12629325	PCDHAC1;PCDHA7;PCDHA12;PCDHA6;PCDHA10;PCDHA4;PCDHA11;PCDHA8;PCDHA1;PCDHA2;PCDHA9;PCDHA13;PCDHA5;PCDHA3	2.27827
cg16772514	C1QL1	2.27333
cg02131995	HAMP	2.27192
cg14201617	C2orf61	2.27138
cg10818781	PHB2;EMG1	2.26765
cg17164520	CGB1;SNAR-G1	2.26627
cg23878206	NUP62;ATF5;IL4I1	2.26361
cg17731079	CDC42EP3	2.2627
cg26180557	POU6F2	2.2593
cg01580681	HAND2	2.25904
cg05799317	C6orf118	2.25893
cg09022993	SPATA18	2.25701	Horvath et al. 2012
cg21332946	LIX1L	2.2555
cg02008169	ZNF267	2.25531
cg23887102	TAAR6	2.25504
cg18180155	SMC1B;RIBC2	2.2541
cg17054360	MTERF	2.25323
cg10728503	MKS1	2.25184
cg04189838	CYP2C19	2.24906
cg10501128	FLT1	2.24844
cg13672791	CACNG7	2.24717
cg05050341	ENG	2.24436
cg08315770	KCNK17	2.24359	Horvath et al. 2012
cg05406101	RWDD2B	2.24358
cg22193702	PADI1	2.24241
cg04731091	WDR37	2.24236
cg23293787	MOCS3;DPM1	2.24177
cg20256494	CABP7	2.24166
cg21621204	HTN1	2.2415
cg00903375	SBDS;TYW1	2.23955
cg20899053	MNX1	2.23911
cg01733599	LIPC	2.23696
cg27049761	B3GNT4	2.23562
cg25841091	UFD1L;CDC45L	2.23443
cg03886898	DIO1	2.23437
cg15045441	C6orf155	2.2332
cg03609102	MUC5B	2.23232
cg13880228	PRLR	2.23215
cg03382346	ZNF611	2.23211
cg09830866	FAM173A	2.23027
cg23173032	ARF6	2.22863
cg20815063	ANKRD49;MRE11A	2.22839
cg14951292	HMOX2;NMRAL1	2.22742
cg03737135	HSPA14;CDNF	2.22626
cg04021421	FANCC	2.22624
cg06736444	LOC100128788;SRRM2	2.22536
cg01299496	NOP10	2.22441
cg17465304	KIF12	2.22413
cg15887846	CST6	2.22367
cg26465666	PDE1A	2.22309
cg27591196	CSGALNACT2	2.22301
cg07607462	UBR1	2.22081
cg00025138	MAP3K9	2.21929
cg21458907	CADPS	2.21909
cg24631950	UBE2D1	2.21826
cg04484789	KRT26	2.21739
cg12563178	PLXDC2	2.21733	Horvath et al. 2012
cg03569637	LOC100233209;FAM113B	2.21577
cg26255649	L2HGDH;ATP5S	2.21504
cg09010998	ZEB1;LOC220930	2.21484
cg25340403	LYPD3	2.21446
cg21626086	C6orf81;LOC285847	2.21431
cg15399561	POP1;HRSP12	2.21377
cg04084157	VGF	2.21376
cg24901474	RGS5	2.21356
cg18250832	NMUR1	2.21329
cg10887021	PCDHB2	2.21223	Lai et al. 2014
cg14289985	ZNF471	2.21056	Horvath et al. 2012
cg22139878	IFIT5	2.20969
cg16638540	ZNF135	2.20925
cg01408558	PDE4A	2.20604
cg09009111	EMILIN2	2.20552
cg19107595	PEG10;SGCE	2.20283
cg01618304	C11orf54;TAF1D	2.20235
cg25044651	LVRN	2.202
cg04086834	SMAP1	2.20176
cg25577842	WIT1	2.20078
cg25157408	HAO1	2.19805
cg15422784	LRRC8B	2.1964
cg18343862	LYVE1	2.1961
cg03387723	SCMH1	2.19289
cg02674804	REEP6	2.19278
cg10074513	TPRG1L	2.19243
cg05046097	MMRN2;SNCG	2.19224
cg00893242	SND1	2.19193
cg15852891	OTP	2.19129
cg11713029	CCDC84	2.19097
cg05102817	RBM18;MRRF	2.19067
cg10807560	SLC8A1	2.19025
cg23423382	ZNF287	2.1893
cg00659129	ASAP1	2.18869
cg00755043	NXNL2	2.18855
cg16279786	NRXN1	2.18802
cg09721659	TSHR	2.18705
cg08575537	EPO	2.18478	Horvath et al. 2012
cg11504646	RTP1	2.18421
cg08400019	NSUN6	2.1841
cg26232187	NTRK3	2.18284
cg26747293	EGFLAM	2.18174
cg01729862	EME2;MRPS34	2.18083
cg06917325	SLC22A8	2.18061
cg17272491	GOLGA3	2.17928
cg08728865	NLRP7	2.17892
cg01517033	WFDC3;DNTTIP1	2.17783
cg08315187	PERP	2.17707
cg25632203	ZNF643	2.17417
cg00592315	C14orf86;FAM181A	2.17276
cg03163246	PPBPL2	2.17244
cg08221207	FEZ1	2.1701
cg23596123	PCDHB6	2.16946
cg17947599	ACOXL	2.16908
cg00425710	MT1A	2.16871
cg21589115	DKKL1;TEAD2	2.16658
cg23642747	INA	2.16534	Horvath et al. 2012
cg02727423	EML1	2.16399
cg09325711	RALA	2.1631
cg07384961	CLDN6	2.16299
cg00974864	FCGR3B	2.16278
cg03580351	GEN1;SMC6	2.1619
cg21842478	HOXB13	2.16173	Horvath et al. 2012
cg05861661	FAM98B	2.16105
cg01407341	SPATA8	2.16037
cg26956535	LAG3	2.15954
cg23752985	VAMP8	2.15859
cg26912636	PMEPA1	2.1571
cg06572160	KCNC3	2.1571
cg26774312	CAV2	2.15554
cg24373308	BAG2	2.15534
cg03970609	MUC7	2.15521
cg02164046	SST	2.1547	Horvath et al. 2012
cg12153542	REM1	2.15397
cg22066521	ABCB5	2.15367
cg22442090	GIMAP5	2.15355
cg18982568	KRT77	2.15303
cg13410437	OR5P2	2.15278
cg15798530	TRPC3	2.15208
cg19560758	ERRFI1	2.15198	Horvath et al. 2012
cg14958635	NEUROG1	2.15087	Lai et al. 2014
cg06213598	ABCA9	2.1507
cg26201579	MTO1	2.14994
cg25828381	TUBA3D	2.14636
cg18828334	PRKD2	2.14523
cg14127659	C22orf23;POLR2F	2.14511
cg11710969	ARMC3	2.14446
cg01684579	NOP16	2.14427
cg27420236	RPRM	2.14391
cg04398282	STAP1	2.14219
cg20647137	AKR1D1	2.14212
cg04418752	PAICS;PPAT	2.14116
cg15945754	C6orf204	2.13996
cg11781389	GLB1L2	2.13988
cg06521761	LRP2BP	2.13982
cg22594309	SYT2	2.13934
cg26298099	ESRRB	2.13865
cg14127958	APPL2	2.13858
cg04603031	CHRNA3	2.13719
cg19731268	CHST3	2.13588
cg07472159	COL10A1;NT5DC1	2.13408
cg20576002	GTSF1	2.13246
cg16731240	ZNF577	2.13162
cg04534765	GALR1	2.1315	Horvath et al. 2012
cg13847113	PRR22	2.12888
cg04737405	OR12D2	2.12787
cg10376763	TNP1	2.12704
cg21421701	BATF3	2.12022
cg04592706	ABCA4	2.11918
cg05721199	SAMD7	2.11888
cg21022247	BIN2	2.11814
cg00463848	KRT2	2.11751
cg16986846	SCGB2A1	2.11689
cg21950518	IL6ST	2.11495
cg21494776	ICAM4	2.11333	Horvath et al. 2012
cg07285276	RAPGEF1	2.11287
cg09995854	IL1F8	2.11161
cg12703269	PSTPIP1	2.11158
cg15926585	COMT;TXNRD2	2.11052
cg04878152	AGTR1	2.11035
cg04532952	CA4	2.10938
cg26829131	HOXC9	2.10837
cg17711870	WWP1	2.10802
cg17233935	DSCR10	2.10738
cg15241708	CNOT6	2.10568
cg27126442	FLJ20184	2.10348
cg20472189	VENTX	2.10344
cg24080529	SYN3;TIMP3	2.10316
cg01843018	C5	2.10265
cg26570233	TAF1D;C11orf54	2.10165
cg27160701	MUCL1	2.10152
cg22392666	FXYD7	2.10046
cg05788437	FYTTD1;KIAA0226	2.1002
cg15770654	MIIP	2.09677
cg17906786	C13orf36	2.09666
cg14482322	TARSL2	2.09634
cg16480209	CNGB1	2.09622
cg01856970	IL15	2.09304
cg26910205	SMEK1	2.09177
cg02473123	CD7	2.09099
cg12949975	GDF7	2.09073	Horvath et al. 2012
cg09298623	ROPN1	2.09028
cg10569616	POT1	2.09008
cg22241124	CNGA3	2.08997
cg10771262	TCF21	2.08995
cg03279443	VDAC2	2.08957
cg01687711	CBARA1	2.08957
cg05161795	ZDHHC3;EXOSC7	2.08953
cg19566405	SLFN12	2.08769
cg07748540	PDGFD	2.08712
cg10157098	FAM71F1	2.08699
cg09186006	SLC16A12	2.08671
cg00180012	LACE1	2.0861
cg03310469	SIX2	2.08374	Horvath et al. 2012
cg15337006	ITGAM	2.08032
cg16858125	ELOVL1	2.08019
cg07027075	LIAS;RPL9	2.07999
cg07285167	CSF3R	2.07419
cg15105703	DUOX1;DUOXA1	2.07369
cg23216015	C7orf16	2.07306
cg02836529	NEUROD1	2.07216
cg00512279	SLC18A2	2.07101
cg04457794	CTSE	2.06992
cg09351894	CREM	2.06962
cg13140464	AP3B2	2.06829
cg13397365	MEA1;KLHDC3	2.06812
cg05607127	KCNG3	2.06811
cg05358291	CYP4F2	2.06807
cg04270835	SLC17A6	2.0678
cg09599653	ARL11	2.06708
cg13696887	KRT82	2.06685
cg13952892	FOXRED1;SRPR	2.0661
cg25054311	SLC26A2	2.06529
cg24252723	CNNM2	2.06447
cg10247268	PFKP	2.06424
cg16645539	SNAPC3	2.06362
cg26530341	TNFRSF10A	2.06227
cg11665562	PSMC1	2.06184
cg09000510	TESK1	2.06144
cg02982690	BHLHE22	2.05906
cg06263943	CACNA1H	2.05872
cg26918645	ZNF285A	2.05869
cg13800022	ITGB1	2.05866
cg09990086	TACC1	2.0582
cg21223353	ANGPTL7;MTOR	2.05631
cg25607161	OR1A1	2.05598
cg15690721	ZNF85	2.05573
cg14056306	CDK3	2.05381
cg11953868	WFDC10A;WFDC9	2.05372
cg18440188	MAP4K5;ATL1	2.05245
cg25023941	QPRT	2.05207
cg01307730	HIST1H2BA;HIST1H2AA	2.05046
cg19864851	SEC24C	2.04961
cg02496295	ADD1	2.04899
cg08942800	CRISP2	2.04879
cg19713083	ATP5G3	2.04864
cg27114120	PROKR2	2.04717
cg05689121	TNRC6A	2.04626
cg22812892	IDE	2.04568
cg03860051	IKZF5;ACADSB	2.04462
cg15873301	SYN2	2.04387
cg20587968	UCN3	2.04345
cg17190608	CUX2	2.04322
cg19037167	TLR2	2.04235	Lai et al. 2014
cg14498423	CLSTN2	2.04086
cg10660256	BHMT	2.04061
cg01017147	DNM3	2.03961
cg03820909	C10orf137	2.03923
cg16340918	KIF11	2.03846
cg20897667	MIMT1;PEG3;ZIM2	2.0382
cg06862644	SPATA22	2.0381
cg23686014	TFPI2	2.03802	Horvath et al. 2012
cg23764381	ATRNL1	2.03633	Horvath et al. 2012
cg06516650	RAB30	2.03406
cg07766612	SLC30A2	2.0327
cg03593419	GABRA4	2.0317
cg18254848	CLC	2.02935
cg18098286	UGT1A10;UGT1A8	2.02821
cg26666286	FCF1;KIAA0317	2.02537
cg27433062	TOMM40L;APOA2	2.02491
cg04420907	WDR16;STX8	2.02454
cg07482936	C17orf82	2.02413
cg04498679	C2	2.01968
cg22862656	SCGB2A2	2.01782
cg20998885	C20orf79	2.01599
cg14100578	SLC25A11;RNF167	2.01545
cg09018824	LIMCH1	2.01444
cg22111003	ACSL3	2.01254
cg17102807	POLR1C;YIPF3	2.01206
cg13151102	KCNJ4	2.01175
cg12970081	GPR32	2.01113
cg03292388	CPZ	2.01069
cg08251399	EHD3	2.00983
cg13038560	C2orf60;C2orf47	2.00894
cg08909157	DOCK8;C9orf66	2.00754
cg04735745	LOC728723;ZBED3	2.00627
cg13573276	SDR16C5	2.00442
cg09113530	MALL	2.00388	Horvath et al. 2012
cg16937611	SERPINA5	2.00272
cg03630344	VAMP3	2.00148
cg05674036	OR3A3	2.00116
cg01049530	BMP3	2.00109
cg03876618	IGFBP7	2.00016
cg07141002	H1F0	1.99908
cg27447740	C20orf166;C20orf200	1.99901
cg19831575	FGF4	1.99851
cg20366906	PCDH8	1.99832
cg15083233	PALM2-AKAP2;AKAP2	1.99827
cg13208492	TSN	1.99822
cg07908874	ZNF511;TUBGCP2	1.99667
cg01782486	ZBTB7B	1.9966
cg01234133	COL1A1	1.99647
cg21770145	SIRT7;PCYT2	1.99565
cg13055001	PPP1CA	1.99522	Lai et al. 2014
cg04435377	ZDHHC8P	1.99486
cg11993300	NDST2	1.99463
cg07879977	OR1F1	1.99311
cg21614638	DAPP1	1.9929
cg12832649	SPOCK1	1.99116
cg19305227	SLC28A2	1.99061
cg20880234	ZMYM2	1.98946
cg05119831	PTPRN2	1.98917
cg07052880	ATP6V1B1	1.98632
cg05688084	MRTO4;KIAA0090	1.9863
cg03476370	NDUFC2	1.98614
cg15165084	GRAMD3	1.98511
cg04515001	KAAG1;DCDC2	1.98301
cg14530801	STX18	1.9823
cg06899329	NDUFA13;TSSK6	1.98189
cg21712678	ZC3H7B	1.98161
cg15676488	SNRPC	1.981
cg03775246	C5orf13	1.9805
cg15264255	NIPAL2	1.97877
cg22657536	EDC3	1.97862
cg20233029	B4GALNT2	1.97713
cg26789453	TMEM116;ERP29	1.97683
cg06803253	GNAT1	1.97601
cg07728874	CD3D	1.97541
cg01040062	ZZEF1;CYB5D2	1.97492
cg20342082	PRSS38	1.97475
cg24687764	C16orf46	1.97417
cg01056568	GLP2R	1.97361
cg03289872	ZNF667	1.97338	Horvath et al. 2012
cg22776578	CPLX2	1.97327	Horvath et al. 2012
cg25833031	MTPAP	1.97301
cg23051598	ATXN2L	1.97214
cg12447832	TTC15	1.97144
cg00995065	SLCO1B1	1.97079
cg10716163	MUM1	1.96854
cg21206959	ZWINT	1.96821
cg21639401	LOC388387	1.96725
cg21341807	RABL4	1.96566
cg18075299	FAM71D	1.9648
cg02813021	ZMYND11	1.9643
cg04384208	FCGR3A	1.96339
cg10947146	XKR6	1.96151
cg05334239	C15orf57	1.95936
cg12880658	CDO1	1.95855
cg21927975	GPR153	1.95746
cg13140267	SNRNP200	1.95741
cg09272256	AKR1C4	1.95653
cg20739510	PEX14	1.9553
cg25027167	DGAT1	1.95484
cg03775422	VSTM2A	1.95455
cg12491710	LIM2	1.95382
cg00871453	WDR67	1.95376
cg24703717	HLA-F	1.95336
cg22467216	TUBB6	1.95328
cg26590537	KCNA1	1.95249
cg09978128	NDEL1	1.95107
cg26645834	SPO11	1.9504
cg20884697	MANEA	1.95012
cg07084746	C3orf27	1.94968
cg06873352	STRADA	1.94913
cg25302370	C6orf165	1.94887
cg00449941	SPAG5	1.94824
cg04645174	OR7A17	1.94766
cg11201288	LRRC40;SFRS11	1.94763
cg19135761	WDR8	1.94712
cg15081561	CCDC102B	1.94696
cg10694959	KPNA6	1.94689
cg22458065	PSORS1C2	1.94649
cg15819333	COX4NB;COX4I1	1.9463
cg02930996	B4GALT6	1.94453
cg12163490	CDH11	1.94325	Horvath et al. 2012
cg08339208	SIKE1	1.94305
cg25448636	FLCN	1.94298
cg25548825	TBX10	1.94177
cg02635407	SH3TC1	1.94167
cg18022926	PBLD;HNRNPH3	1.94116
cg09473585	C3orf14	1.94051
cg26833602	SUSD3	1.94011
cg09453312	ITK	1.93945
cg12417466	ARPP-21	1.93928
cg13775495	IL12A	1.93495
cg26683023	ZNF678	1.93468
cg05499853	FAM188A	1.93248
cg20862119	KRT76	1.93244
cg15536490	TFAP2C	1.9321
cg19241311	DEFB123	1.93089
cg01918706	UBE2T	1.93083
cg12857957	LZTFL1	1.93025
cg17872757	FLI1	1.93022
cg22842233	UPK1B	1.92957
cg14076411	RNGTT	1.92812
cg15640375	LPPR3	1.92629
cg11466837	TRIM29	1.92585
cg10910775	CDC27	1.9242
cg02973883	DCAF4	1.92308
cg22161476	FSTL5	1.9227
cg22182975	GPR31	1.92253
cg05973262	NOTCH4	1.92221
cg19917856	NCCRP1	1.92133
cg11084611	C2orf27A	1.9209
cg16879115	APOBEC1	1.9209
cg05072008	FIGNL1	1.92067
cg06277481	KANK3	1.92031
cg15757271	WNT5A	1.91896
cg02162069	ZIM2;PEG3;MIMT1	1.91885
cg04382920	SLC25A31	1.91742
cg05368341	SYT6	1.91735
cg17500329	TRAPPC9	1.91707
cg24762359	ATP12A	1.91568
cg00399483	DCC	1.91465	Horvath et al. 2012
cg02566518	FUT11	1.91385
cg25447894	CSDC2	1.91373
cg16483916	PLAC2	1.9133	Horvath et al. 2012
cg00839802	MAN1A1	1.91278
cg09462576	MRPL55	1.91063
cg11680236	NME6	1.91044
cg17398613	SLC37A1	1.91041
cg13704403	DGKQ	1.9089
cg21070087	HECW1	1.90881
cg02102644	SYNRG	1.90824
cg23422659	WNT9B	1.90772
cg18938150	LSM12	1.90606
cg09286787	C19orf63;FAM71E1	1.90484
cg11476254	ACSF3	1.90331
cg17592734	ZNF175	1.90185
cg13470920	VAV1	1.90174
cg22980079	FAM193A	1.90125
cg06585027	PI4KB	1.90106
cg20895028	CDH26	1.90105
cg11880892	PPA1	1.89975
cg08284598	SLC4A11	1.89956
cg14145194	ICAM3	1.89932
cg16168311	APOA1BP	1.89891
cg10810921	CRLF1	1.89744
cg24060938	CPA2	1.89707
cg20649991	LILRB5	1.896
cg00094319	PABPC3	1.89578
cg21400896	ABI3	1.89551
cg13520715	C21orf129;NCRNA00112	1.89426
cg25124433	KRT20	1.89404
cg20572838	EME1;MRPL27	1.89333
cg27416067	IL12RB2	1.89254
cg06407137	CD300LB	1.89202
cg22991148	C21orf29	1.89172
cg10356463	ITIH1	1.89158
cg15784615	LTBR	1.89122
cg08090396	NEK4	1.89089
cg11368643	PCDHB15	1.89033	Lai et al. 2014
cg04269351	VTI1B	1.88809
cg16185365	RNF168	1.88806
cg00893636	EPM2AIP1;MLH1	1.88749
cg01465325	ERCC6	1.88722
cg09149294	ARRDC4	1.88533
cg05301852	FABP1	1.88516
cg14579051	COL9A1	1.88489
cg07566050	PEA15	1.88458
cg08929103	CRHR1	1.884
cg15791248	FGFR1	1.88348
cg17682828	FXYD1;FXYD7	1.88288
cg08413366	PPP3CB	1.88216
cg04386405	ZNF83	1.88162
cg13058581	NCRNA00167;PRDM10	1.88159
cg14366598	IL25	1.88158
cg08082692	CHST15	1.88099
cg17386181	MT1B	1.87984
cg17108819	CD8A	1.87923
cg15649193	TECR;MIR639	1.8792
cg15559700	UGT1A9;UGT1A10;UGT1A8	1.87918
cg01687051	LUC7L	1.87915
cg20768743	CD226	1.87876
cg03349953	PCDHB5	1.8785
cg13360404	KLHDC10	1.87842
cg07944811	GCK	1.87749
cg06746101	TMED3	1.87651
cg23555120	NUAK1	1.8764	Horvath et al. 2012
cg13160888	NIPSNAP3B	1.87594
cg04336379	LOC389458	1.87412
cg16068833	UBXN11;CD52	1.873
cg11177404	CGB2;SNAR-G2	1.87175
cg23548920	ARRDC2	1.87158
cg21169285	MAPK9	1.87122
cg25692621	ASB4	1.87099
cg13759778	NF1;OMG	1.87025
cg24378421	MTMR9	1.86924
cg18960218	SLC7A7	1.86871
cg18333824	SF3A3	1.86773
cg01443452	GAPDHS	1.86755
cg04032566	NSUN3;DHFRL1	1.8674
cg03839341	RAB10	1.86731
cg20857253	TCP10L	1.8672
cg20543416	MMP25	1.8668
cg14183455	MATN1	1.86638
cg25694542	ZFYVE1	1.86613
cg22619018	CSMD1	1.86553
cg11638200	PRKCQ	1.86343
cg01428678	GPHN	1.86148
cg23033845	TMEM88	1.86128
cg04089739	C3	1.86117
cg11630242	AKAP10	1.86039
cg04233664	CTBP2	1.86033
cg03382797	C9orf98;C9orf9	1.86011
cg18891387	NDUFA11;VMAC	1.85882
cg08107767	MRPS17	1.85871
cg16245844	ADIPOR2	1.85763
cg04367351	PLA2R1	1.8571
cg26413355	FAM151B	1.85684
cg21942576	GPBP1L1	1.85449
cg24304712	C1orf101	1.85403
cg21907579	TBX5	1.85369	Lai et al. 2014
cg15843217	PCGF3	1.85259
cg26863324	DDX52	1.85222
cg25095814	CASP8	1.85162
cg19497444	SLC22A18	1.85097
cg00650876	YBX1	1.85074
cg20887241	HTR1D	1.8477
cg19112780	PTPRU	1.84504
cg00911351	PCDHGA4;PCDHGA6;PCDHGA1;PCDHGA5;PCDHGB1;PCDHGA3;PCDHGA2;PCDHGA7;PCDHGB2;PCDHGB4;PCDHGB3	1.84467
cg24512303	HNF4G	1.84463
cg07026910	INPP5D	1.84304
cg27210136	SP6	1.84158
cg12598178	UTS2R	1.84112
cg12864235	CDH9	1.8406
cg25368651	DNHD1	1.84021
cg17854497	SEPHS1	1.83979
cg01055695	PAEP	1.83901
cg25932713	PARP9;DTX3L	1.83769
cg01036779	SH2D3A	1.83766
cg24091474	TYROBP	1.83731
cg11065385	B4GALNT3	1.83713
cg23759710	OXER1	1.83615
cg22220722	PLA2G2A	1.83557
cg01550148	H2AFY	1.83291
cg11197066	PGAP1	1.83268
cg16299341	OSBPL9	1.83211
cg19226099	MC3R	1.8321
cg09873510	SGTB;NLN	1.83192
cg18722841	PHOX2A	1.83107
cg00136405	IL21	1.83094
cg17080277	PTPRB	1.83018
cg01443067	USP8	1.82966
cg18809289	ALOX5	1.82946	Horvath et al. 2012
cg01637734	CD5L	1.82922
cg18690395	PRKG1;CSTF2T	1.82899
cg18403396	B3GAT2	1.82702
cg26015133	FCRLB	1.82456
cg10007692	TECR	1.82451
cg08085267	C17orf57	1.82353
cg25341032	ADD3	1.82305
cg04063348	IL17F	1.82224
cg06470552	SMC3	1.82101
cg22040627	SLC13A5	1.82089	Horvath et al. 2012
cg13417824	RPP38;C10orf111	1.82045
cg16268051	CDC42	1.81995
cg26205131	SLC6A3	1.81944
cg01405107	LOC404266;HOXB5	1.81919
cg09001953	UFSP2	1.8191
cg21743830	CCL25	1.81858
cg13752005	CCDC64	1.81757
cg13633026	MS4A8B	1.81676
cg00223186	ACBD6	1.81626
cg07091552	UCP3	1.81551
cg07125991	PLBD2	1.81466
cg23472215	GSTM3	1.81362
cg00119079	LAMP3	1.81248
cg26196700	SORD	1.81171
cg17250929	S100A5	1.81089
cg03539474	SLC25A12	1.80838
cg16825643	FAM38A	1.8073
cg14732540	BRDT	1.80713
cg08987989	PGGT1B	1.80521
cg04527989	PTCD2;MRPS27	1.80473
cg01656470	PEG3;ZIM2	1.80428
cg01035422	PLIN1	1.80428
cg06134936	HERC4	1.80342
cg19483159	DYNLT1	1.80331
cg14546153	APCDD1L	1.803
cg22816171	DDX50	1.80231
cg25737664	SIRPD	1.80152
cg19001226	HOXD1	1.80142
cg16539629	C14orf132	1.79939
cg09496393	KPNA5	1.79754
cg03266453	EN1	1.79668
cg22878324	PURB	1.79551
cg15171237	CASP3;CCDC111	1.79548
cg14448864	HYAL3;NAT6	1.79539
cg03364781	ALPK1	1.79397
cg09374949	ISYNA1	1.79357	Horvath et al. 2012
cg21640749	RAB37;CD300LF	1.79324
cg02144298	CEBPA;LOC80054	1.79232
cg21053529	GJD2	1.79136
cg03589001	MORF4L1	1.79082
cg08124030	TM4SF1	1.79081
cg14755009	TIRAP	1.79066
cg08847038	THNSL1;ENKUR	1.79058
cg27497687	MED19;TMX2	1.79004
cg25545182	DRG1	1.78992
cg03400060	BHMT2;DMGDH	1.78986
cg07248310	HOOK1	1.78985
cg14419187	UNC80	1.7896
cg07356771	IL17RB;CHDH	1.78798
cg21289924	EIF3A	1.78793
cg21230435	OPN1SW	1.78761
cg14294758	LSAMP	1.78729
cg06403126	PPP2R2A	1.78586
cg20023231	HS3ST2	1.78499	Horvath et al. 2012
cg25218351	TRIM54	1.78479
cg05949173	IL1F10	1.78249
cg22639768	FAM13C	1.78236
cg26431343	C22orf28	1.78231
cg09060914	SELP	1.78126
cg13634678	TM2D3	1.78112
cg24290574	CPA3	1.7805
cg27508002	SMAD9	1.78003
cg23144899	CRYGC	1.77997
cg07569756	LRRC59	1.77873
cg20655010	PREPL;C2orf34	1.77686
cg06675496	ITSN2	1.77671
cg05402265	ICK	1.77557
cg10075436	MZF1;LOC100131691	1.77387
cg10347418	ZNF436	1.7725
cg03242880	BTG4;MIR34C;MIR34B	1.77139
cg26718585	PROC	1.77129
cg18651821	PDCD2	1.7708
cg23326689	STMN2	1.76958
cg09331011	GNAL	1.76921
cg21572897	CD80	1.76878
cg20176532	ZNF256	1.76876
cg00491404	EPS8L3	1.7687
cg12792367	TFR2	1.76822
cg05104081	KIAA0802	1.76636
cg15785580	BCKDK	1.76624
cg00309204	C17orf61	1.76499
cg12082615	SETDB1	1.7648
cg19104072	B3GNT1	1.76435
cg06378976	TFEB	1.76365
cg21137823	PRKCZ	1.76349
cg15942562	CDCA3	1.76325
cg00427635	TBC1D21	1.76155
cg18013830	RPUSD2	1.76133
cg09837361	GMEB1	1.7611
cg09736922	THPO	1.76019
cg14454278	TDP1	1.75998
cg08270477	NCRNA00188;SNORD49B;SNORD49A	1.75994
cg13365761	SCNN1G	1.75952
cg13449372	C10orf2;MRPL43	1.75903
cg16961218	ATP9B	1.7585
cg04576855	SERTAD2	1.75847
cg05221264	CELA2A	1.75812
cg18412984	WDR20;HSP90AA1	1.75698
cg13833831	MATK	1.75689
cg11706111	ZNF19	1.75681
cg12108912	TMEM177	1.75671
cg25903375	SETD7	1.75637
cg26524263	KLK13	1.75571
cg21542793	ADRA2B	1.75545
cg20379012	NSMCE2;KIAA0196	1.75492
cg19398446	NUDT2;KIF24	1.75395
cg18829411	HMGN1	1.75339
cg04466253	ACBD5	1.75294
cg26021103	LPCAT3	1.75219
cg23863670	CCL28	1.75185
cg14409941	ADAMTS2	1.75143
cg13945069	DDX59	1.751
cg20647888	CCDC3	1.74926
cg12467090	PIK3C2B	1.74879
cg21614231	SUGT1P1;BAG1;CHMP5	1.74824
cg27622610	OR1G1	1.74814
cg24008892	PMF1;SLC25A44	1.74792
cg08654655	CADM3	1.74703
cg08961832	NLRP6	1.74653
cg16729794	MOBP	1.74416
cg22660578	LHX1	1.74354	Horvath et al. 2012
cg19017193	VEZF1	1.74323
cg07498879	OSM	1.74254
cg08507270	TAS2R8	1.74242
cg12770741	NXN	1.74214
cg02686662	PPAP2C	1.74156
cg04391111	TP73;WDR8	1.7406
cg18901980	KRT25	1.74024
cg24239808	BTD;HACL1	1.73985
cg10881306	CRIM1	1.73919
cg24249775	KRT10;TMEM99	1.73902
cg16313343	BRF1	1.73859
cg06289589	ANKRD5	1.73812
cg08717396	HIST1H2BJ;HIST1H2AG	1.73735
cg24235633	LOC440356;CDIPT	1.73703
cg26528713	TRUB1	1.73699
cg07525445	TPM1	1.73561
cg04398978	CBX4	1.73388
cg05741384	ODC1	1.73312
cg26624273	SNIP1	1.73199
cg11422541	ADCY6	1.73108
cg11998307	SCARF1	1.73059
cg03386373	SPATA3	1.73036
cg26023389	GCM1	1.72941
cg14271400	EPHB2	1.72927
cg14386312	ZNF544	1.72912
cg17357062	FCN1	1.7291
cg27537561	VDR	1.72861
cg00528052	KDM5B	1.72803
cg08158570	ZNF503;C10orf41	1.7272
cg09976774	FOXM1;C12orf32	1.7261
cg02039171	CEBPE	1.72533
cg16270890	HAGH;FAHD1	1.72422
cg17778120	RBP2	1.72395
cg11195002	ICAM5	1.72322
cg22476251	PPEF2	1.72244
cg03872376	ZP4;LOC100130331	1.72148
cg14275779	PLEKHH3	1.72114
cg08157638	VANGL1	1.71885
cg20073553	NKX3-2	1.71806
cg03665457	HSD17B7P2	1.71798
cg02280309	PKLR	1.71787
cg08570521	TLL1	1.71734
cg08020381	IDI1	1.71543
cg08453021	ELMO1	1.71543
cg05023691	RGS13	1.71479
cg01587454	DCAF4L2	1.71477
cg24965984	GPAM	1.71394
cg08040471	C17orf62	1.71341
cg25021182	CELA2B	1.7127
cg12539975	PRDM12	1.71253
cg27556566	RNF138	1.71194
cg04229238	RB1CC1	1.71185
cg10247252	GALR2	1.71107
cg00062776	TULP2	1.71104
cg17037924	DUT	1.70966
cg21948169	TET1	1.70949
cg12421458	HDGF	1.7079
cg19250891	ATP1A4	1.70681
cg13840968	LTB4R;LTB4R2;CIDEB	1.70658
cg04127255	PSG2	1.70493
cg25095380	PRDM5	1.70385
cg10353870	BIN1	1.70289
cg02254407	PLEKHB1	1.70279
cg01623438	CTSZ	1.70261
cg09555879	GRIK5	1.70256
cg01204271	YBX2	1.70202
cg14436426	OPRL1;RGS19	1.70158
cg06145308	CNOT4	1.70131
cg11612345	SMOC2	1.70117
cg13266631	NEFL	1.70104
cg18416881	AKR1B1	1.70044
cg12628062	PSMC3IP	1.70018
cg02382666	CALD1	1.69729
cg22305782	FBXL19	1.69711
cg25151806	ELOVL2	1.69662
cg17641252	PLEK2	1.69654
cg26324201	CDK7	1.6964
cg25935911	DBC1	1.6962
cg09539408	STRN3;AP4S1	1.6951
cg11277126	TRPC4AP	1.69388
cg27445265	BCCIP;UROS	1.69376
cg08101172	PSIP1	1.69253
cg10450322	CDKN2C	1.69178
cg11214889	CLUL1	1.69023
cg20925178	CWF19L1	1.69008
cg14283939	THSD4	1.68886
cg15755548	ARHGDIG	1.6887
cg18384168	FGF22	1.68776
cg24823993	NHP2L1	1.68703
cg06548519	LYZL6	1.68654
cg01155039	AMN	1.68532
cg05807444	VPS28;NFKBIL2	1.68479
cg26743024	CACNG4	1.68361
cg18418503	STAM	1.68304
cg22867063	ZNF214;NLRP14	1.68292
cg07950803	CD1A	1.68263
cg11843691	TBC1D9	1.68251
cg17877656	PCGF6	1.68221
cg14576824	RPS6KC1	1.68204
cg19404190	SPINK7	1.68159
cg06500476	C4orf19	1.68138
cg10100220	LNX2	1.67995
cg13785207	RPS19BP1	1.67893
cg15869022	GPR17;LIMS2	1.67841
cg19098826	BIRC6	1.67823
cg19819571	KIAA0174	1.67763
cg19205533	RERG	1.67722
cg10548277	MED8;C1orf84	1.6768
cg18374517	ALPPL2	1.6759
cg15186584	C9orf24	1.67523
cg24497819	SELPLG	1.67419
cg04419707	RPL3;SNORD43	1.67397
cg06797533	PLIN2	1.67347
cg18241647	WFDC12	1.67274
cg25182523	FAM129A	1.67274
cg17470697	ZCCHC24	1.67127
cg02847216	CTAGE1	1.67121
cg14465910	GTPBP2;MAD2L1BP	1.67089
cg21105318	ITGB6	1.67081
cg06119575	TAL2	1.66958
cg01782320	YME1L1;MASTL	1.66898
cg21415604	C4B;STK19;C4A	1.66756
cg11784785	SLC6A5	1.6662
cg23233234	FAM136A	1.66549
cg00233307	MAP4K1;EIF3K	1.66448
cg04001333	FLVCR2	1.66389
cg19624775	MORC3	1.66384
cg21030598	PAK2	1.66352
cg26073060	EIF3I;C1orf91	1.66341
cg02721374	OR1D2	1.66269
cg25842356	43162	1.66227
cg09462587	EIF1AD;BANF1	1.66194
cg14401897	SBNO2	1.6614
cg12611860	PIK3C2A	1.66138
cg04345908	HLA-DQB2	1.66117
cg10455676	MTIF2	1.66031
cg13430425	ADSL	1.66016
cg15230273	EFNA5	1.6599
cg07366967	EXD2	1.65989
cg03221914	HIST1H2AJ	1.65958	Lai et al. 2014
cg04351979	CTXN1	1.65931
cg19515446	HIST1H1T	1.6586
cg23776012	KRT222	1.65813
cg13818368	CAMTA2;SPAG7	1.65799
cg17430393	VSNL1	1.65758
cg07922606	HIST1H3E	1.65644
cg15669273	LYRM4;FARS2	1.65628
cg15605888	CCDC138	1.65439
cg15811427	FPR1	1.65435
cg16773899	EDIL3	1.65343
cg01492649	TMEM135	1.65319
cg16293105	SIGLEC6	1.65229
cg26656135	EYA4	1.65107	Horvath et al. 2012
cg22740783	CGREF1	1.64972
cg01120307	SEMA4D	1.64957
cg12643449	IFRD1	1.64927
cg26365668	MRPS18C;HELQ	1.64773
cg19996355	PBX4	1.6473
cg03808835	PCDH15	1.64701
cg04223956	NEK7	1.64655
cg13700897	RSPO2	1.64636
cg22874046	ICAM1	1.64579
cg20254231	WDR33	1.64554
cg09548084	SLC35B3	1.64532
cg06391468	SOX9	1.64472	Horvath et al. 2012
cg26649005	ZNF32	1.64383
cg11158430	UTS2D	1.64313
cg15916628	ZNF579	1.64187
cg05546383	OTUD4	1.64129
cg04317366	PRPF8	1.64059
cg24331162	SYT8	1.64022
cg08419026	SLCO5A1	1.63991
cg23514672	TEKT5	1.63938
cg12454725	SYT17	1.63788
cg26575445	GPR160	1.63762	Horvath et al. 2012
cg09527021	TADA1	1.63725
cg02470959	SFRS8	1.6371
cg06165395	GRIK3	1.63613
cg23040064	JPH3	1.63534
cg15435730	TFAP2D	1.63453
cg03504078	PCDHB3	1.63265
cg20476877	ISCU;SART3	1.63155
cg26637069	APLNR	1.63153
cg15309223	TMEM59;C1orf83	1.63131
cg04006554	ENPP5	1.63121
cg18349835	VIPR2	1.63089
cg17615007	ZNF134	1.63089	Horvath et al. 2012
cg03723845	BTNL8	1.63024
cg12791554	PRR4;TAS2R20;PRH1	1.63001
cg13553498	CLEC2D	1.62802
cg01737532	FRG1	1.62781
cg20406878	NR5A2	1.62587
cg22506453	KRT39	1.62584
cg14831838	CDK5R2	1.62384
cg20164720	AGTRAP	1.62339
cg21378206	IL1F5	1.62336
cg23739036	PEX10	1.62269
cg15637528	C6orf146;C6orf201	1.62249
cg07774025	HSD17B7	1.62195
cg17778721	CBX1	1.62154
cg00893987	RPL7L1	1.62072
cg21032583	LMLN;IQCG	1.62059
cg17676129	SYCE1	1.61974
cg04348872	ADCY3	1.61933
cg02850329	RCAN3	1.61912
cg23426587	KLHL9	1.61902
cg16886188	ADRA2A	1.61895
cg13109289	C1GALT1	1.61875
cg12354377	ANK3	1.61763	Lai et al. 2014
cg24719601	PHOX2B	1.6171	Lai et al. 2014
cg20583073	S1PR4	1.61659
cg02612026	CASP9	1.61648
cg00063144	KRT31	1.61394
cg11864993	PCDHB16;PCDHB8	1.61385
cg17356112	PLXNA4	1.61314
cg01998682	ZBTB2	1.61252
cg07011445	NSMCE4A	1.61235
cg16862361	XDH	1.61233
cg17741291	DDX21	1.60655
cg04520084	CCNC	1.60637
cg04455064	TUFM	1.6053
cg18834029	POLL;RP11-529I10.4	1.60478
cg24141135	MARS	1.60472
cg22183849	DHX36	1.60397
cg23877786	RPL13;SNORD68	1.60313
cg14658285	ADAT3;SCAMP4	1.60207
cg10579246	DPH3;OXNAD1	1.60195
cg08452348	CATSPER3	1.60141
cg00795268	COMMD9	1.60118
cg22635155	PDE2A	1.6009
cg07017706	KRT73	1.60037
cg25341726	IL27	1.60004
cg19478478	TRDN	1.59967
cg11879480	SLC36A4	1.59885
cg17071536	MUDENG;EXOC5	1.59765
cg03238797	ADAMTS18	1.5971	Lai et al. 2014
cg08783491	STX16	1.59657
cg25864727	NCRNA00158	1.59607
cg21019522	SLC22A18;SLC22A18AS	1.59574
cg04428853	TMEM110	1.59523
cg06394897	AK2	1.59459
cg26119796	RB1	1.59304
cg20767356	HORMAD1	1.59223
cg01333788	GJB5	1.59202
cg21350115	CALCRL	1.59164
cg15822411	CCDC83	1.59156
cg18059088	HS3ST1	1.5913
cg20804555	GSC	1.58953
cg15091337	POLE4	1.58945
cg22335340	PTPN6;C12orf57	1.58941
cg19589427	TNFSF18	1.5892
cg05761971	FAM82A1	1.5892
cg01399317	FAM83H	1.58915
cg03100752	ASNA1	1.58802
cg24730207	PTGES2;LOC389791	1.58633
cg25371560	MED18	1.5844
cg20227213	GOLGA4	1.58431
[truncated: 11,133 more rows]
